# Supplementary material for: Particle and nanofiber shaped conjugated microporous polymers bearing hydantoin-substitution with high antibacterial activity for water cleanness
Source: Royal Society of Chemistry journal article supplement (doi:10.1039/c7ta09405a), 2017-11-28
Supplement: c7ta09405a1.pdf [file c7ta09405a1.pdf]

## Electronic Supplementary Information

for *J. Mater. Chem. A*

### Particle and nanofiber shaped conjugated microporous polymers bearing hydantoin-substitution with high antibacterial activity for water cleanness

Fei Wang<sup>a</sup>, Feng Ren<sup>a</sup>, Dan Ma<sup>a</sup>, Peng Mu<sup>a</sup>, Huijuan Wei<sup>a</sup>, Chaohu Xiao<sup>a,b</sup>, Zhaoqi Zhu<sup>a</sup>, Hanxue Sun<sup>a</sup>, Weidong Liang<sup>a</sup>, Jixiang Chen<sup>a</sup>, Lihua Chen<sup>b\*</sup>, An Li<sup>a\*</sup>

**Table S1** The porous properties of CMPH-1 and CMPH-2

| Samples | $S_{\text{BET}}$<br>[m <sup>2</sup> g <sup>-1</sup> ] | $S_{\text{micro}}$<br>[m <sup>2</sup> g <sup>-1</sup> ] | $V_{\text{micro}}$<br>[cm <sup>3</sup> g <sup>-1</sup> ] | $V_{\text{total}}$<br>[cm <sup>3</sup> g <sup>-1</sup> ] | DBJH<br>[nm] |
|---------|-------------------------------------------------------|---------------------------------------------------------|----------------------------------------------------------|----------------------------------------------------------|--------------|
| CMPH-1  | 556                                                   | 371                                                     | 0.197                                                    | 0.375                                                    | 2.727        |
| CMPH-2  | 1416                                                  | 734                                                     | 0.393                                                    | 1.358                                                    | 3.849        |

**Table S2** Elemental analysis of CMPH-1 and CMPH-2

| Elements | CMPH-1 | CMPH-2 |
|----------|--------|--------|
|          | Mass%  | Mass%  |
| C        | 76.7   | 82.9   |
| H        | 3.9    | 3.9    |
| N        | 2.6    | 2.8    |
